# Supplementary material
Source: Springer Nature journal article supplement (https://www.springermedizin.de/resource/supplementary/12885_2013_3941_MOESM4_ESM.pdf/9464854)

**A**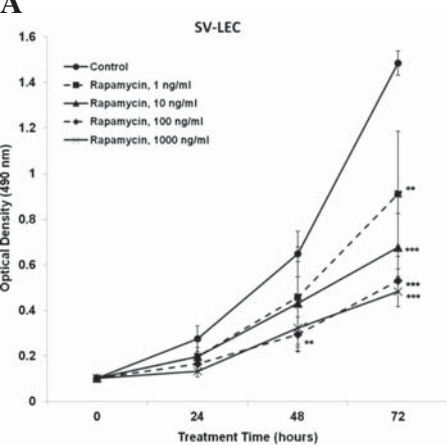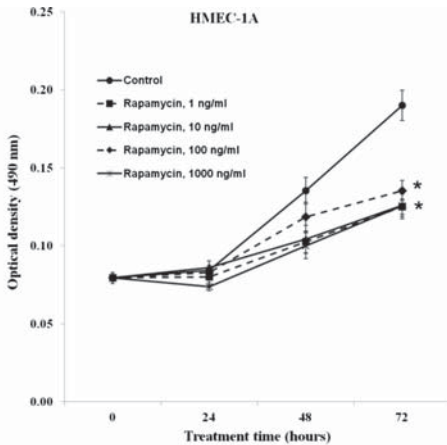**B**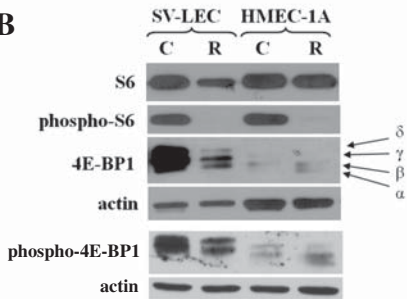

Supplement: MOESM4 [file 9464854]
